# Supplementary material for: Long non‐coding RNA uc.291 controls epithelial differentiation by interfering with the ACTL6A/BAF complex
Source: PubMed Central journal article supplement — EMBO Rep. 2020 Feb 4;21(3):e46734. doi: 10.15252/embr.201846734 (PMC7054673; doi:10.15252/embr.201846734), 2020-02-04
Supplement: EMBR-21-e46734-s001.pdf [file EMBR-21-e46734-s001.pdf]

## Appendix for:

### **The long noncoding RNA uc.291 controls epithelial differentiation by interfering with ACTL6A/BAF complex**

Emanuele Panatta, Anna Maria Lena, Mara Mancini, Artem Smirnov, Alberto Marini, Riccardo Delli Ponti, Teresa Botta-Orfila, Gian Gaetano Tartaglia, Alessandro Mauriello, Xinna Zhang, George A Calin, Gerry Melino and Eleonora Candi

## Table of contents

|                                                                                                              |     |
|--------------------------------------------------------------------------------------------------------------|-----|
| Appendix Figure S1. <b>Characterization of uc.291 transcript by complementary DNA (cDNA) “walking”</b> ..... | 2   |
| Appendix Figure S2. <b>Uc.291 transcript sequence</b> .....                                                  | 3   |
| Appendix Figure S3. <b>ACTL6A expression during keratinocyte differentiation</b> .....                       | 4   |
| Appendix Table S1. <b>Modulated T-UCRs during keratinocytes differentiation</b> .....                        | 5-6 |
| Appendix Table S2. <b>List of ranked candidates interacting with uc.291</b> .....                            | 7   |
| Appendix Table S3. <b>Primers list used in the cDNA walking experiment</b> .....                             | 8   |
| Appendix Table S4. <b>Primers list used in the RT-qPCR</b> .....                                             | 9   |
| Appendix Table S5. <b>Primers list used in the ChIP experiments</b> .....                                    | 10  |

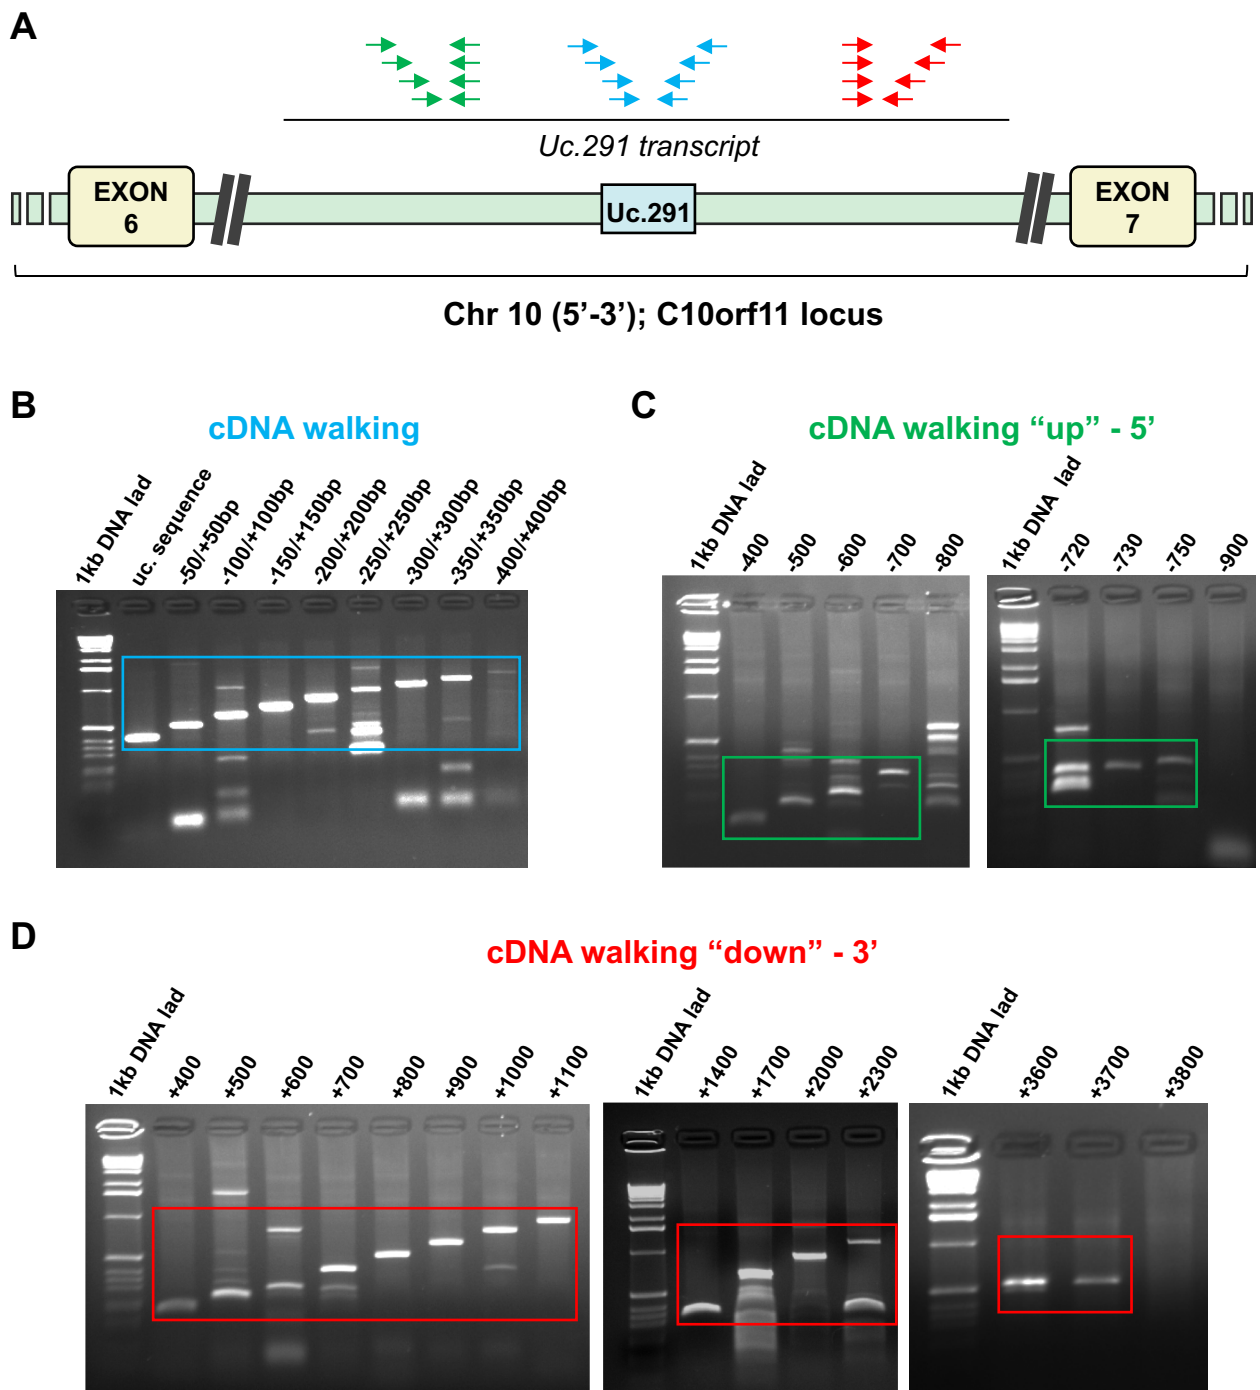

**Appendix Figure S1. Characterization of *uc.291* transcript by complementary DNA (cDNA) "walking".** By using a multiple primers amplification approach we defined the length of *uc.291* transcript. Primers were designed on 3' and 5' side of *uc.291* conserved sequence at specific distances. "0 bp" represents the amplification of the genomic reported *uc.291* length (424 bp in *UCNEbase*). (A) Scheme of the walking approach; (B) PCR fragments obtained using the blue primers reported in (A); (C) PCR fragments obtained using the green primers reported in (a); (D) PCR fragments obtained using the red primers reported in (A).

5' CTGGGCACTTAGCTCTCCACTTTAATTATTCATCCCTTATGAAGAAAAATTTCCCCGTTGTGCTTTATTGTCCCTCCAGC  
CCCCACCTGAGCTCACGCAGACTCTTCCCTCTTTCCCTCCCCAAAGTGGCTTGTGTGTCGAAGGGCTTTCCACTGGGGTG  
CTTATTCCATTTATGCCTTTAGTATGCATTTTGTGTTCTGCCAAGGGGGTCAGGAGGGCACATGGAGAAGCCAGATGGCT  
TACCTCTTCCCTCAGGAAACACGCCGCTATTTAGCTGGCACCTTCCCAACTCAAGCGGGGTGAGATTCCACTGTTGGA  
GAGAGAGTTGGTTCAAATGCCACTGTCCCTGAGATCACAGCTCCAAGTTCTCTAGGCTATGCACTTTCTACTTCTCTG  
CCACTTGTGGAGTTTCTGCCAGAAACAGCCTTTTAGGAGATATTAGAAAGGGGGGTGGGAAGGGAGGGATGGGAAAAA  
GCAACTCTTGTATTTTATGGTCCCTCGTTCAGGCACAAGTTCTGTATTTTAATCCGGCTGAAATAAGAAACCATAATCC  
ATGGATGAAAAGATGGTGGACAAACTCAGTTAAATCTTGTGACCCCTGAGGATGTGTGTTTTTCCCTATTTCTGGTTTTT  
GACGTTCCCTTCCCTGCTGCCATTTCCCACTTTAATCTTTGAAAAGCCAAGCAGTTTGGCTGGCCAGGCCAGGGAACTT  
ATTTGTATGCAGCACAAATTTGAGAATCTGTTCTCAGCCTGTGCCGAGTGAAAAATGGCCTGCATTTTCTTGATAGCCCA  
TGTGGTTGTAAGAATAAATGGCTAATGAATTACAGATGAACATTGACGCAAATTAATCTTCCCGCTGTCCCTGGGTTAT  
ATGGCAGCCATTTAAAAGTTAATCAATACATAAAGTTGAAAACATGCAGGCATGCAGTTGTTTGGATGTAATAAACA  
TCAGAGGGAACCCGGGAGGTTTGCACCCAGTCCATGTATCATAAATGACAGGTTTTATGTTAATGGACTAAATATTTTTT  
ATTGGAAGGGAGCAAATGTCAGCTTAACCTTGTGTAGCCCCGATTCAACTTTCTTTGAGGTTGGTGAAGACGGCTGAC  
GTGTCAATTGGAAATGAAATGTAAAGGGAGAAAAAAGCACAAACGGAGACAAAGCGAGGATGGGAGCCGTTTGGAGACGTG  
GTGCAGCGCTTACATTCTGCAGCAATTCATTAACGAAAACGTAAACTCTGATATTTCTAATGTTGCTGTAAAATGGTTTA  
CTAGGAACAACCTTAAATGGTTATTAGTAAAACAAGTACCAGATCTGCCAGATATCTTTTCCAGTGCAGGCTTTTGT  
GAAAACCTTTTACCAGGTCATATTTGCTGGAGATTTATAATTAGTCTTTTTCTTAAATGTGAGAAGTGGAGGAGAAACAG  
CGTGATGGCTCTCAGCTCTGTATTCCATAGATCTTTCTTTTGAACGGTGTCCAATGACTTCGAATAACCATGTGTTCT  
CTTTTGGAAACTTATATCTTAATTACTTTTCAAGTCAATATTTGTACCTCTGCCGTGAGTCTGGAAGGACCAGGGAGC  
TAAAAGAGAAAAGAAATGCCAGTGGCAGTGCATCTCGTGGACAAAAACAGGCTGAGACACAGGAGAGCAATGGCTTC  
ACTTGAACAGAAAAATACAGACTTAGTTTCAGCTTTTTCATTTTTTTTCCACATATAAAATAAACTAAATATATGTCAGTG  
GAGCATGGGGTCTTAGAAAATAACACACACTTTATAAAAAATAATTAGAAAACGTTTTTAGACAAAAGGATATCGTGTTTTTAA  
TGTCCCTTCTGCAACCAATTGTCTCAGGCTCTTTCAGTGTCTGAGGGCACATTCAATGGCAGGGCTTGGAAAGAAATTA  
TTCAGTAGATAGCAAGATGAGGCTGAAGGATGAGAAAAAGGGACAGGGGTTGTGATACTTATCCAGTGTTCAGATCTTGC  
AAAAGATATGAATTGCACCTTTTTATGTGTTAAATAATTTGTTAAATCACAAGAAATTTGTGTTTCTAATGGGCCTAAG  
TTTTCATAGTAATCAGTATTATGTGATACTAAATTAGTAAACCAACTGATGGGTTCAATGGTCTTTCATCATCCCTTAA  
GCAAAATGGGGAGAACTTTCTGTTATGAAAACCGAAGCATGGCTCACTGTTAACCATGATGACATCTCACCCACTACTG  
CTCCTGAAGTCTTAACTCTATTTTTCTTCTACCTCTTCTACCTCTTAGAGGATGAGTCTTTTACCTGTTTTGTTC  
CTTTGTGTTTCCGCGGTGTAATATAAGTCCACAGTAGGGGGTAGGAGGCAAGAACCTGATTTTCTTCTTTGCTTCTAG  
TGTCTGGGGCCTGGCCTATAATAGGTTCTTGTAAATGGCAGGTAAGTGAATGGCGGACTACATTTCTTATGGTCTTTAG  
TAATTTATAACTCCGGCTATTTTTTTTGTAGTCAATGATTTCTAGTCACTGTGTTAGTGTTTTACATATAATACAA  
TACTTGTCTTAGTTAGTTGTTAACTCTAGAAAGTAAAGGTTTATCTTCTCATTTTATAGAGGCAAAAACATGTTCAAGGAA  
TTGAAGCTAATATTTTGTGTTACTGTTAGTATGTAGCAATTCAGAAATTTGAATCTGACCTGTTTGTCTCTGTATCAG  
CTATACAGTACTCCCCAAATTCCTGTCACTCATCTTGTCCCTGGGGATTAATAATCTCATTAAGTGACCACAACATTTAAT  
TCTAGACTATAACCAGCCAGCTCCCCAACTGGCTGATAATGAACAGAAGTATTAGATTACAATTTGCAACCTAAACCTG  
GTGCTCTGAGTCTTACCTATAGAAAGCAATCTTTGACTGTACAAAAGTAGCACATTTGGCTATTTGATGATGGGTGATATG  
TCACTCAAATATGTGTGTTCTGTGGTCTAGGGAAATACAAGGAACCTCTCAAATCATGAGAAAAGTGTTCAGCAACAGA  
AATCTAACAAATAGTACTGAAATGCATAGGCATTAATTTCTTCACTCAGAAGTGAGAATGGAGGTAGGCAGCCCAGGAC  
AGTGATAGTGGCTGAAAGAGCAGATCAGTAGGCACCCAGGTCCTTTCTGTCTTTCTGTCTACTACCTTTTTCAGCATGTG  
CATTTTAGCCTCATGGTCTCAAATGGTTGCTACTGCTCCTGGCATCATTTCTCACCCAAAGCAAGATGAAGAAGGATG  
TCTTTCCCTTATGAGGCATTCGCTTTTCATTTGTGGATAGACAGCTTCTAAAGATGTCTGTCTCTTTCTCATTACCCAG  
ATCATGTCTTGGGAGGCTGGAAAGTCAAATGTTTCAGTTTTCATGCTGTTATAGTAGAGGAAGGCAGGATAAAAAGGGAG  
CCAATGCATAGTGTCTCCTATGTAAGATAAATCGCATTTTTTGTATACCTAATAAAGACTTGAACTTTGCTAGATGCCA  
TATGCACATCAACTTATATCATGTTTACAACCACCTTGTACAGAAGATATTTATCCCATTACACTAAGAAGAGGTGA  
TCTCATTGTTCAATTTCCACCTATGAGTGAGAATATGCCGTGTTTGAAGGGGAATATCACACTCTGGGGACTGTTGTGGG  
GTGGGGGGAGGGGGAGGATAGATTGGGAGATATACCTAATGCTAGATGACGAGTTAGTGGGTGCAGGCACCAGCATG  
GCACATGTATACATATGTAACCTGCACAAATGTGCACGTGTACCCTAAAACGTAAAG 3'

**Appendix Figure S2. Uc.291 transcript sequence.** Uc.291 complete sequence (3816nt) characterized by cDNA walking followed by sequencing of the PCR fragments obtained. Ultraconserved sequence is in red, predicted ACTL6A binding sequence is in light blu.

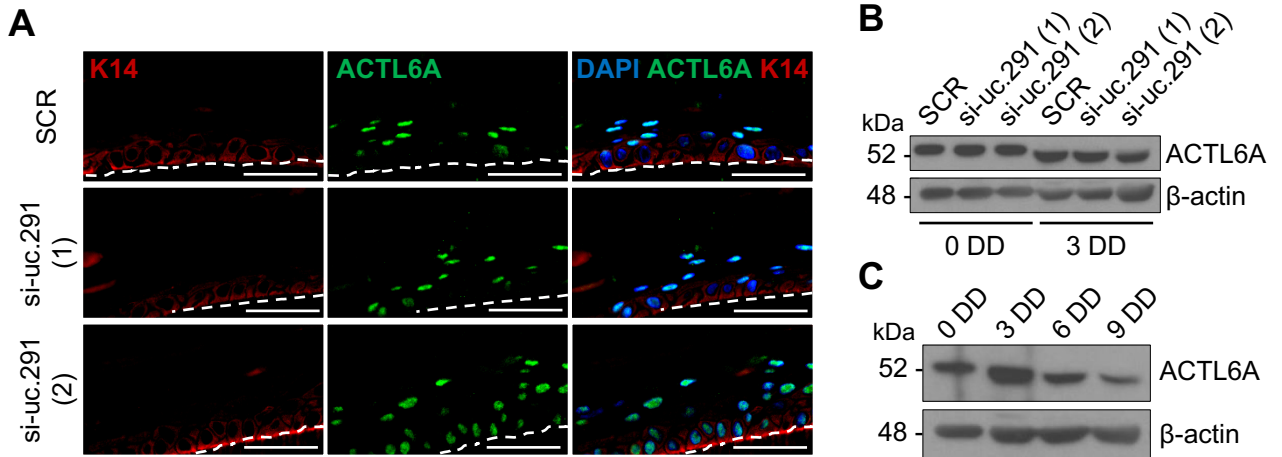

**Appendix Figure S3. ACTL6A expression during keratinocyte differentiation.** (A) IF staining of K14 (basal layer marker) and ACTL6A in uc.291-depleted, si-uc.291(1) and si-uc.291(2), organotypic human epidermis compared to scramble control (SCR). Bar: 25um. One representative experiment of three is shown. (B) Immunoblot showing ACTL6A protein levels in HEK293 cells transfected with scramble sequence (SCR) or si-uc.291(1) and si-uc.291(2) oligos and collected at proliferating (0 day) or differentiating (3 days of differentiation, DD) conditions.  $\beta$ -actin was used as loading control. (C) Immunoblot showing ACTL6A protein levels in HEK293 cells collected in proliferating (0 day) or differentiating (3, 6, 9 days of differentiation, DD) conditions.  $\beta$ -actin was used as loading control.

| Probe for T-UCR | Fold-change | Parametric p-value | FDR       | Description                                 |
|-----------------|-------------|--------------------|-----------|---------------------------------------------|
| uc.262          | 6.9380217   | 5.00E-07           | 0.0005516 | CAGGCTGAGTACAAATTACTIONATGCAAGGGAGGCTGAGGGT |
| uc.283          | 3.9902288   | 0.003973           | 0.0439591 | CAGGGCGCGGGATTGGATCAAATCACATAAACTGCAAAA     |
| uc.145A         | 3.4355936   | 0.0025296          | 0.0367763 | TCCATCCACGCGCCTCATACATATTGATTTCTGACACCA     |
| uc.36           | 2.935153    | 0.0042701          | 0.0455497 | ACTTTCCTTGTGTGCTTGCACTATAGGTTTGGGACTGACA    |
| uc.88           | 2.6496588   | 0.0053214          | 0.0514358 | GGAGGGAAGCAGAAGTCGGGAAGAAAAGAGAAAAGCAGCA    |
| uc.231          | 2.4696586   | 0.0142377          | 0.0922464 | TGTGCATGTCAGCAGAATTCATAAGAACTTACAAAATCTT    |
| uc.291A         | 2.3985146   | 0.0144979          | 0.0932284 | TGCCATATAACCCAGGGACAGCGGGAAGATTAATTTGCGT    |
| uc.473A         | 2.2716886   | 0.0023525          | 0.035347  | CAGACACGGGGAGACACAACAGCACAGAACAGAGAACAAA    |
| uc.220          | 2.1861354   | 0.0191878          | 0.1134554 | TCAAGATTTGCCAAACCTAACC GCATGTATCATTTGCA     |
| uc.339          | 2.1658364   | 0.0007872          | 0.0230286 | ACAGGAATGTAATTTGCCCGGATGAGGCCCGAGTTTAA      |
| uc.77A          | 1.9122857   | 0.0158713          | 0.0992502 | TCTTGGGAGCAGTGTGACAGAAAAGAGTGTGGCGAGAAC     |
| uc.117A         | 1.8411175   | 0.0018504          | 0.0321861 | AAACTGTTTATTAAGATGGGCTGGAGGCGCTGGTGTGCA     |
| uc.170          | 1.661361    | 0.0060615          | 0.0552691 | ACACAGGAACAAAGCAAGAGAACAGAACTCAGAGCCAGCA    |
| uc.346          | 1.6574337   | 0.0007029          | 0.0218725 | TTCGGAGGCGGCTTTTCTTATTCAAACAGGCCCAATG       |
| uc.142A         | 1.6263274   | 0.0016429          | 0.0308253 | GTCACACCCGAACCGCCAACAAAATTATCTTAAGCTGCCA    |
| uc.388A         | 1.5296091   | 0.0099989          | 0.0733348 | AGCAACACACCATTTCACAGTCTATCGGGCACAAACACAT    |
| uc.20A          | 1.4471174   | 0.0436931          | 0.2063864 | CTTGGTGAGGTTTGGGCGGAATAAGAAAGGTGTTGGTGG     |
| uc.110          | 1.4082587   | 0.0031046          | 0.0398286 | ACAAGTTGCTGTTAATTTAGTGCAGGGAGGACGGGATGGA    |
| uc.398A         | 1.3920305   | 0.0497388          | 0.2267608 | GGATCGGGAGGAGGAGAGCCAGCAGCCACAAGAAGACAG     |
| uc.478          | 1.3431458   | 0.0239285          | 0.1326632 | AAACAATGGTGGTACGACAAAGGAGAGTGCGGCAGCGGG     |
| uc.217A         | 1.276802    | 0.021647           | 0.1232889 | AAAGCACCTTCACAAAGCCACAAAAGAAGCAGGACAG       |
| uc.208A         | 1.2115439   | 0.0348729          | 0.1738692 | TCAATGAAGAATGAAGAGAAGTAGAAAGCAAGAGTGAAGT    |
| uc.310A         | 0.65047     | 0.0210915          | 0.1214111 | GGCCTGTCTCTCTCTCTTTTCAAACCAAATCTGCTT        |
| uc.369          | 0.6353444   | 0.0467179          | 0.2170893 | TGATCTCATATTAATTTCCCTGAATCCGCCCTTGGC        |
| uc.198          | 0.6342153   | 0.0182638          | 0.1091729 | CTGGTGACAAGTGAATTTGCTGTGCGCCTCATTTAGCTGT    |
| uc.262A         | 0.6117229   | 0.0442415          | 0.2085941 | ACCCTCAGCCTCCCTTCATAGTAATTTGTACTIONCAGCCTG  |
| uc.16           | 0.6081178   | 0.0409966          | 0.1964124 | CTTGTTCAACACAGAGCTTAGAAACCCTCCTTCCACTCCC    |
| uc.478A         | 0.5942682   | 0.0280721          | 0.1492947 | CCCGCTGCCGACTCTCTTTGTCGTACCACCATTTGTTT      |
| uc.352          | 0.5837183   | 0.0263843          | 0.1424184 | TTTAAAGGCCAAGTCTAAAATAGATTTGCACCCACGCCCC    |
| uc.242          | 0.5766099   | 0.0308061          | 0.1585047 | TTTAGTAGTCCGCTATTCTGCTTAACATGTGGCACCCTG     |
| uc.138          | 0.5757989   | 0.0400969          | 0.1932085 | CTGACTTCTTTCATCTTCCCACTTCACAAAATTTGCTCA     |
| uc.28           | 0.5717847   | 0.0282912          | 0.149858  | AACTATATAACCAGGCCCTGTGAAAATACCACCCAACAGT    |
| uc.462          | 0.5621613   | 0.0064514          | 0.0572034 | GGTGGGTGGAGAGACGAAGTCAGGGCTGTTTGTGAATAT     |
| uc.452          | 0.5604607   | 0.0385909          | 0.1877993 | AGCGTGTTTCTAATGCTATTCACTGCTTGTGATTTGA       |
| uc.346A         | 0.5596938   | 0.0026415          | 0.0374468 | CATTGTGGCCTGTTTTGAATAAGAAAAGCCGCTCCGAA      |
| uc.325          | 0.5579312   | 0.0104034          | 0.0750892 | GGGGTTTTGTTGTCAGAGTAGTCCCGCCTCATGTTTTGT     |
| uc.151A         | 0.5475617   | 0.0166494          | 0.1023798 | TCTTGCTCACCTGGTCAAACCCATTCTCACTIONCATTT     |
| uc.390          | 0.5450069   | 0.0322261          | 0.1638461 | AATTTAGTCAATTACTIONTTTTCAGCCTGCAAGCCTCCTGGG |
| uc.396          | 0.5407496   | 0.0161342          | 0.1001554 | CATCTTGACAGCTGCGCCACTIONGATTAATCTCACAA      |
| uc.77           | 0.5379875   | 0.0382952          | 0.1867631 | GTTCTGCCACACTCTGTTTCTGTCACTIONGCTCCCAAGA    |
| uc.412A         | 0.5237442   | 0.031904           | 0.1631937 | TTCAAATCCACACAAGCCTGCCACTTGCACTIONGATCATCCC |
| uc.21A          | 0.5211857   | 0.0325936          | 0.1651708 | ACCATAATTTCTCATTTCCCAACTIONCACACATGCTGAA    |
| uc.465A         | 0.5019852   | 0.0026524          | 0.0374468 | TTCTCTCATCTCCCGCAGCTTAGCACCCTGCTTTGTTGG     |
| uc.400A         | 0.497497    | 0.0270436          | 0.1454441 | AATCATCTGACACAAAGATAATTGAGCCAGCCTCGCCAC     |
| uc.457          | 0.496534    | 0.0180181          | 0.1085937 | AGACATATTCCAGATCACAACTTCCCAAGAACCTGCTCCCT   |
| uc.268          | 0.4928927   | 0.0027834          | 0.0383176 | ACTATCATCACAACTCATTGTTCCATCTGCTCCCTCCC      |
| uc.129          | 0.4880591   | 0.0251525          | 0.1374754 | CCATTGCCATCATGTGCTCGCTGCCTGCTAATTAAGACTC    |
| uc.223A         | 0.4698592   | 0.0008607          | 0.0242558 | GGCTGATTTATGTTGCTATTCCCTCTCACCAGTCTGCTCAT   |
| uc.373A         | 0.46421     | 0.0193354          | 0.1138975 | TTGAAAGGAGACAACATTGTCCCGATTTCCCACTIONGCGACA |
| uc.473          | 0.4634708   | 0.0022747          | 0.03482   | TTTGTCTCTGTTCTGTGCTGTTGTGCTCCCGTGTCTG       |
| uc.133A         | 0.4487399   | 0.0259639          | 0.1407152 | ACTTCCGATTTAATTTCTCCATGCCCTTGACATCCACA      |
| uc.476A         | 0.4466684   | 0.0276283          | 0.1476632 | GCTGATTGATGGCTCTCCTCACTIONGCTGAAGGCTGTAT    |
| uc.422          | 0.4430617   | 0.0099478          | 0.0730988 | GAGATTTGCACTIONTACACCTCAGTCCCTGCTGCTGTTCC   |
| uc.250          | 0.4364047   | 0.0070389          | 0.0603978 | GCAAATGATTATACACTATCAACTIONGCGCACCAAGCGC    |
| uc.10A          | 0.4228508   | 0.0180147          | 0.1085937 | TCTGACTCTCTAATGGCCTGCTGCTCTCACTIONCAATT     |

Continue on the next page

|         |           |           |           |                                          |
|---------|-----------|-----------|-----------|------------------------------------------|
| uc.335A | 0.4227937 | 0.0146008 | 0.0936515 | CAGCAGAAGCAGGTCTCAGTCCAGTGGTTAATGTAGTG   |
| uc.281A | 0.4197648 | 0.0082006 | 0.0648906 | GCCTTTATTGGAATTCTGAAACCTCTCTGCCTCCCTGGCT |
| uc.391A | 0.4037248 | 0.0289005 | 0.1520426 | AAATTATTGCATTGCTGGTGGCAATTTGTGGGCATGTGTT |
| uc.305A | 0.3992737 | 0.0028265 | 0.0385672 | CGGCAGGCTCTTCCCATCTCCCATCCATTTCATCATCTCG |
| uc.161A | 0.3980419 | 0.0007734 | 0.0228909 | CCATCATAATTTGTTCAATTTGGTGCCCATCAGCCAGCCT |
| uc.177A | 0.3960284 | 0.048816  | 0.224542  | CACAATTTCAAACCTGCCTGCTAATTTCCACCACCTGTCA |
| uc.159A | 0.3946312 | 0.0031571 | 0.0401024 | GGTCCTCCACAGTCCCAAATTCACCCGTTTAAGCCATAAT |
| uc.416A | 0.3747073 | 0.0023867 | 0.0355154 | GCTGCCATGCACACCGCTCTTACGGCTACAATTACAATG  |
| uc.134A | 0.3737976 | 0.0088282 | 0.0679086 | GCTCATAAATTAAGTCTCTTTTGTGCTGGCTGGCCTTGT  |
| uc.1    | 0.3736053 | 0.0064382 | 0.0571786 | CACATCCACCAGGCTTTGCTGAGCAGTTTTAGTATC     |
| uc.181A | 0.3669021 | 0.0016712 | 0.0308772 | GAATGAGCAGGCCCAAGGTGTTTCAACTGGAGTGTTTTTC |
| uc.349  | 0.3633513 | 0.003553  | 0.0415567 | ATGTTTTCCACAGCCCAAGACCTTTGGTGCATGCTTTTGA |
| uc.266A | 0.3471284 | 0.0207761 | 0.1199206 | AGACCATTCAATTTACAGTCTTCCAGCCTCGTTTGAGA   |
| uc.136  | 0.3449797 | 0.0143047 | 0.0925777 | CAATAACGCTTTGATAGATCCCTGTCTGCCCGGTGCTTGA |
| uc.411  | 0.3341136 | 0.0003292 | 0.0146432 | ACCCATTTGTACCCAGCATTTCCTTTGTGTATAGAACA   |
| uc.164A | 0.3221855 | 0.0045111 | 0.0470165 | TTACCACATGCTGTACAGTTAGCTCAGCCAGGCTTGT    |
| uc.329A | 0.2860004 | 0.0025932 | 0.0370876 | TGTAGTCATCAAGTGAGAAAGACATCCTCCTCCTGGCTGC |
| uc.232  | 0.2818089 | 0.0006993 | 0.0218725 | AAGTGTGTGTCAATAACGCAGCCAAGATCTGCCAATCG   |
| uc.63A  | 0.2714599 | 0.0012258 | 0.0280916 | CAGTGTTCCTGCTTTGCTTGCCTGGTAAATTTGCTTTT   |
| uc.257  | 0.2624234 | 0.0002364 | 0.0124403 | CTGATGGATTCCAGGCCATTGCTGTCACTGATGAACTA   |
| uc.338A | 0.2565722 | 0.0010626 | 0.026549  | CTGTCGCTGCCTGTGCTGTACCTGTCTGTGGATAAATAG  |
| uc.183A | 0.250974  | 6.32e-05  | 0.0068978 | CCCAGTGTGAGATGTCTCCAGGTGCCTCTCTTTCTTTG   |
| uc.252A | 0.2239623 | 0.0002429 | 0.01259   | TCTCAGGAAGCCAGCCAATTAAGGACTTGACCATATTGA  |
| uc.204A | 0.1862553 | 2.7e-06   | 0.001604  | GCTCTAATTTACAAGCCGCTGCCTAATGAATTGTCTGGG  |

### Appendix Table S1. Modulated T-UCRs during keratinocytes differentiation

#### Description:

Number of classes: 2

Type of univariate test used: Two-sample T-test

Nominal significance level of each univariate test: 0.05

#### Summary of Results

Sorted by p-value of the univariate test.

Class 1: differentiated; Class 2: undifferentiated.

The genes are significant at the nominal 0.05 level of the univariate test

| Gene Symbol | Expressed in epidermis* |
|-------------|-------------------------|
| BATF2       | yes                     |
| SMARCE1     | yes                     |
| ACTL6A      | yes                     |
| TRIM16      | yes                     |
| TADA2A      |                         |
| CENPO       |                         |
| DEK         | yes                     |
| CRTC2       | yes                     |
| UBE2B       |                         |
| BRCC3       |                         |
| CHCHD3      |                         |
| SETMAR      |                         |
| CHD2        |                         |
| SMARCC2     | yes                     |
| VEGFA       | yes                     |
| PRMT3       | yes                     |
| C17orf49    | yes                     |
| GATA2       |                         |
| MRGBP       |                         |
| BMI1        | yes                     |
| CPA4        | yes                     |
| PRMT6       | yes                     |
| CHCHD2      | yes                     |
| DCAF17      |                         |
| SMARCD3     |                         |
| SETDB1      |                         |
| EYA1        |                         |
| UBE2U       |                         |
| ZCRB1       |                         |
| GATA3       | yes                     |
| EPC1        |                         |
| PRKD2       | yes                     |
| ATXN7L3     | yes                     |
| HJURP       |                         |
| CENPA       | yes                     |
| SIRT1       |                         |
| PRKCA       |                         |
| HIST1H1C    | yes                     |
| ZNF451      |                         |
| PHLDB1      | yes                     |

**Appendix Table S2. List of ranked candidates interacting with uc.291.**

Table showing the top 40 uc.291 interactors derived from the protoarray. See also Figure 4 and Figure EV4. \* The expression in human epidermis was extrapolated from *The Human Protein Atlas* (<http://www.proteinatlas.org>).

| cDNA Walking      |                            |
|-------------------|----------------------------|
| Name              | Sequence 5'-3'             |
| F-50              | TTCCCAACTTTAACTTTGAAAAGC   |
| R+475             | AAACGGCTCCCATCCTCGCTTTG    |
| F-100             | ATGTGTGTTTTCCCTATTTCTGG    |
| R+525             | CGTTTTCGTTAATGAATTGCTGCAG  |
| F-150             | GGATGAAAAGATGGTGGACAAAC    |
| R+575             | AGTTGTTCTAGTAAACCATTTTAC   |
| F-200             | CACAAGTTTCTGTTATTTAATCCG   |
| R+625             | AAAGGATATCTGGCAGATCTGGG    |
| F-250             | AGGGAGGGATGGGAAAAGCAAC     |
| R+675             | TCCAGCAAATATGACCTGGTAAAG   |
| F-300             | GTTTTCTGCCAGAAACAGCCTTTTAG |
| R+725             | GCTGTTTCTCCTCCACTTCTCAC    |
| F-350             | CCAAGTTCCTCTAGGCTATGCAC    |
| R+775             | CACCGTTCAAAGGAAAAGATCTATG  |
| F-400             | CTGTTGGAGAGAGAGTTGGTTC     |
| R+825             | AAGATATAAGTATTCCAAAAGAGAAC |
| cDNA Walking UP   |                            |
| Name              | Sequence 5'-3'             |
| R5'-UP            | GGCTGTTTCTGGCAGAAAACCTC    |
| F-456             | CGCCGCTATTTAGCTGGGCACC     |
| F-505             | GGAGGGCACATGGAGAAGCCAG     |
| F-620             | CAGACTCTCCTTCTTTCCCTC      |
| F-647             | GTCCTCCAGCCCCGACCTGAGC     |
| F-685             | CATCCTTATGAAGAAAAATTTCCC   |
| F-715             | CTGGGCACTTAGCTCTCCAC       |
| F-732             | AACTACAGTGAGGCCTGGGCAC     |
| F-861             | GAGTTGCTGCCTGTACAGCTG      |
| cDNA Walking DOWN |                            |
| Name              | Sequence 5'-3'             |
| F3'-DOWN          | CTTTACCAGTCCATATTTGCTGG    |
| R+875             | TCCTTCCAGACTCACGGCAGAGG    |
| R+923             | GCGAGATGGCACTGCCACTGGC     |
| R+1060            | CTAAGACCCCATGCTCCACTGAC    |
| R+1177            | AATGTGCCCTCAGACACTGAAG     |
| R+1288            | CTTTTGCAAGATCTGAACACTGG    |
| R+1440            | GGGATGATGAAGGACCAATGAAC    |
| R+1578            | CTTCTAAGAGGGTAGAAAGAGG     |
| F3'-1500-DOWN     | CCCCTACTGCTCCTGAAGTCC      |
| R+1826            | CAACTAACAGAGTACTAGAAATC    |
| R+2118            | CAGCCAGTTGGGGAGCTGGCTGG    |
| R+2400            | CCTGGGCTGCCTACCTCCATTCC    |
| R+2664            | CCAGCCTCCCAATGACATGATC     |
| F3-2700-DOWN      | GGATGCTTTCCCTTATGAGGC      |
| R+3040            | CTGGTGCGCTGCACCCACTAAC     |
| R+3100            | CTTTACGTTTTAGGGTACACGTG    |
| R+3200            | GTCAGACCTGATAATTTAGGGC     |

**Appendix Table S3. Primers list used in the cDNA walking experiment (see also Appendix Figure S1).**



| <i>Name</i> | <i>Sequence 5'-3'</i>      |
|-------------|----------------------------|
| T-UC291 FW  | GCGTCAATGTTTCATCTGTAATTC   |
| T-UC291 REV | CTGTTCTCAGCCTGTGCCGAG      |
| T-UC183 FW  | TGCTTCTTCTCTTCTTCTTTTG     |
| T-UC183 REV | TGCTCTCTACCAGGTTGGCG       |
| T-UC257 FW  | GCTGATGGATTCCCAGGCCATTG    |
| T-UC257 REV | GTTCTGATCTTGAGGTAATTAGCC   |
| T-UC338 FW  | AGTGAGCCTTGGAGACTGAACATCC  |
| T-UC338 REV | ACAGCCCTGGAGACTGAAATCCTC   |
| T-UC63 FW   | CAGTGTTCCTGTTTGCTTGC       |
| T-UC63 REV  | CCTGTTGCTTTCTTTCTGTTCTC    |
| T-UC36 FW   | AAATGTGTGTGAGTGCAAGCAG     |
| T-UC36 REV  | GGGTCAATACCGCATGAAGGCC     |
| T-UC88 FW   | TGTCAAACTGCCAGGAGCAAG      |
| T-UC88 REV  | GCCAATCTGTCACCGTTCAGC      |
| IVL FW      | CAGGTCCAAGACATTCAACC       |
| IVL REV     | CAAGTTCACAGATGAGACGG       |
| KRT10 FW    | AGGAGGAGTGTATCCCTAAG       |
| KRT10 REV   | AAGCTGCCTCCATAACTCCC       |
| LOR FW      | CTCTGTCTGCGGCTACTCTG       |
| LOR REV     | CACGAGGTCTGAGTGACCTG       |
| U6 FW       | GTGCTCGCTTCGGCAGCACATATAC  |
| U6 REV      | AAAAATATGGAACGCTTCACGAATTT |
| ACTIN FW    | GTTGCTATCCAGGCTGTGC        |
| ACTIN REV   | AATGTCACGCACGATTCCCG       |
| LCE1B FW    | GCTACAATACTAAGCAGTTC       |
| LCE1B REV   | CTATTCTTGCCCTTTCAGCATCA    |
| LCE1C FW    | AATCCAGGACCGCAAAGT         |
| LCE1C REV   | TGGACCTGTGAGCCTCTCAG       |
| LCE2B FW    | GGTTGACTAACTCTGCCAGG       |
| LCE2B REV   | GGCACTGGGGCAGGCATTTA       |
| LCE2D FW    | CTGCAGAAGAGCTCTGGTACTG     |
| LCE2D REV   | CTCCATCAAGCACAAAGTTCTG     |
| LCE3A FW    | CTGAGTCACCACAGATGCC        |
| LCE3A REV   | CTTGCTGACCACTTCCCCTG       |
| LCE3C FW    | CCAGTTGTCCCTCACCCAAG       |
| LCE3C REV   | CCGGAGCTTAGAGCACAGTC       |
| LCE6A FW    | CAGGGAGCTGAAAAGCCAGA       |
| LCE6A REV   | GAGGGGAGCATTGGGAACA        |
| SPRR2B FW   | AGGAACCTTGGCTTTGTCAGT      |
| SPRR2B REV  | AGCTCATGCCAGGTGAAAG        |
| KPRP FW     | CCTGAAGGACTGCTTGCCTG       |
| KPRP REV    | CTGGGCAAAGGGGGATTGAG       |
| HRNR FW     | GAAGTGCTCAGGGCAAGAT        |
| HRNR REV    | GCACCTCTGCTCTTGACAT        |
| FLG FW      | CAATCAGGCACTCATCACAC       |
| FLG REV     | ACTGTTAGTGACCTGACTACC      |
| TBP FW      | TCAAACCCAGAATTGTTCTCCTTAT  |
| TBP REV     | CCTGAATCCCTTTAGAATAGGGTAGA |

**Appendix Table S4. Primers list used in the RT-qPCR**

| <i>Name</i> | <i>Sequence 5'-3'</i> |
|-------------|-----------------------|
| LOR FW      | TCTCCTTTCCTGCATTGCT   |
| LOR REV     | TTCGTTTGCCAGCCATTCCT  |
| FLG FW      | CCAAGGCAAAGGGCAAGATTC |
| FLG REV     | GCTACGCTGTCTAGCTCTCTG |
| LCE1B FW    | TGAAGGAGGGAGCCTCAAGA  |
| LCE1B REV   | TACAGGTGAACATGGCAGGC  |
| TBP FW      | CTGACAGGTAAGGAGGACGC  |
| TBP REV     | AGTTACCTGACCTCTCCCC   |

**Appendix Table S5. Primers list used in the ChIP experiments** (see also Figure 5).
