# Supplementary material for: Long non‐coding RNA uc.291 controls epithelial differentiation by interfering with the ACTL6A/BAF complex
Source: PubMed Central journal article supplement — EMBO Rep. 2020 Feb 4;21(3):e46734. doi: 10.15252/embr.201846734 (PMC7054673; doi:10.15252/embr.201846734), 2020-02-04
Supplement: EMBR-21-e46734-s002.pdf [file EMBR-21-e46734-s002.pdf]

## Expanded View Figures

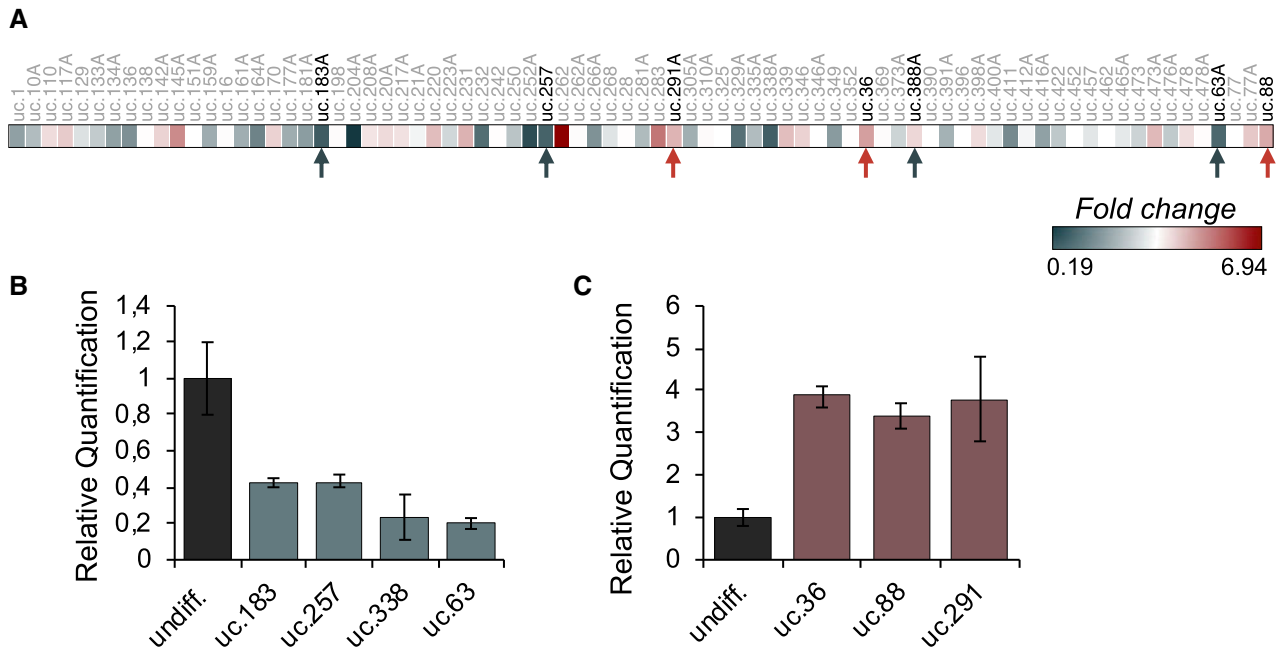

**Figure EV1. UC RNA is modulated during keratinocyte differentiation.**

A Heatmap showing microarray data results. Data are expressed as fold change.

B Validation by RT-qPCR of down-regulated UCs showed in (A).

C Validation by RT-qPCR of up-regulated UCs showed in (A). In (B) and (C), the quantification is relative to the same UC expression in undifferentiated HEKn (undiff., dark grey bars); data shown represent the mean  $\pm$  standard error (RT-qPCR has been done in triplicate);  $n = 1$  (technical).

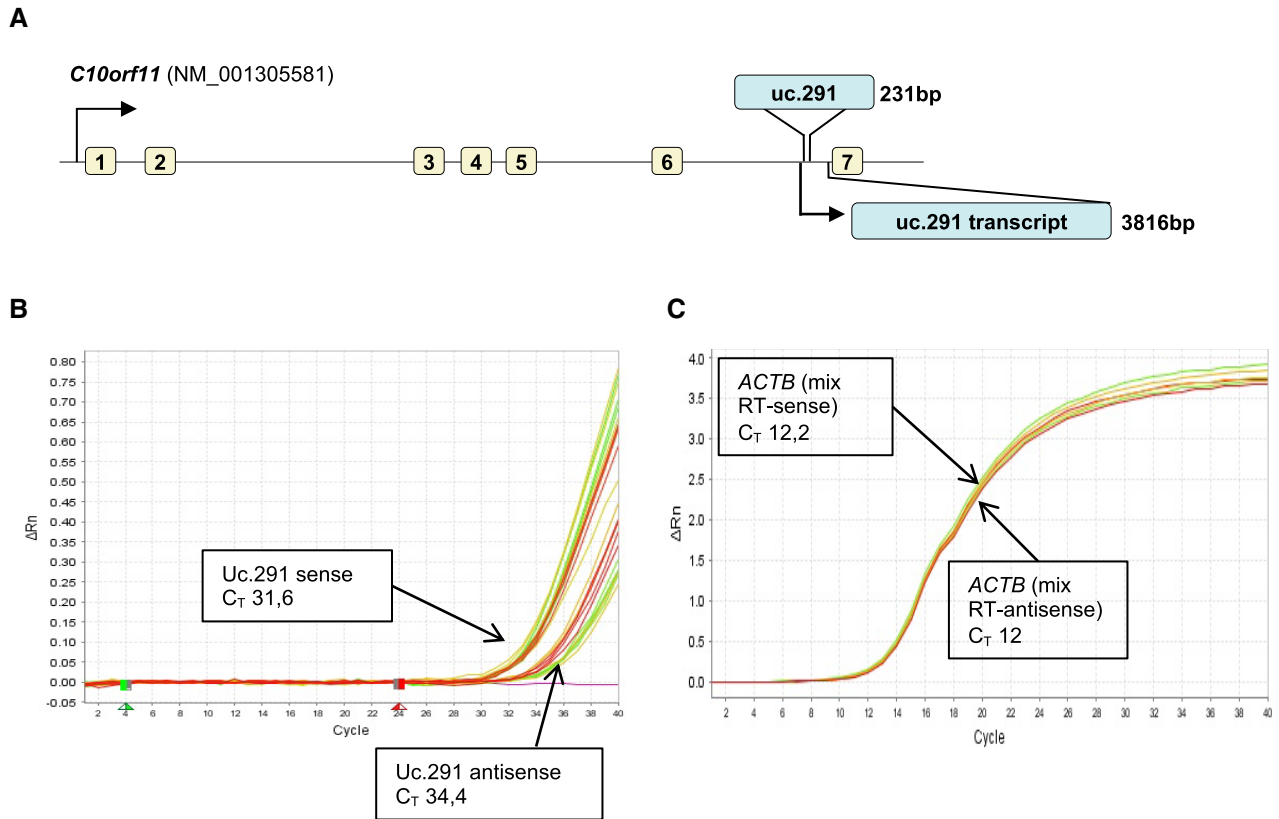

**Figure EV2. Characterization of uc.291 transcript by strand-specific RT-qPCR.**

A uc.291 (3,816 bp) genomic location on chromosome 10 in the sixth intron of the *C10orf11* gene.

B uc.291 strand-specific RT-qPCR; representative amplification plots (#2 of Fig 1G) of strand-specific RT-qPCR; qPCR curves relative to the sense and the antisense transcripts are shown.

C *ACTB* mRNA strand-specific RT-qPCR was used as control.

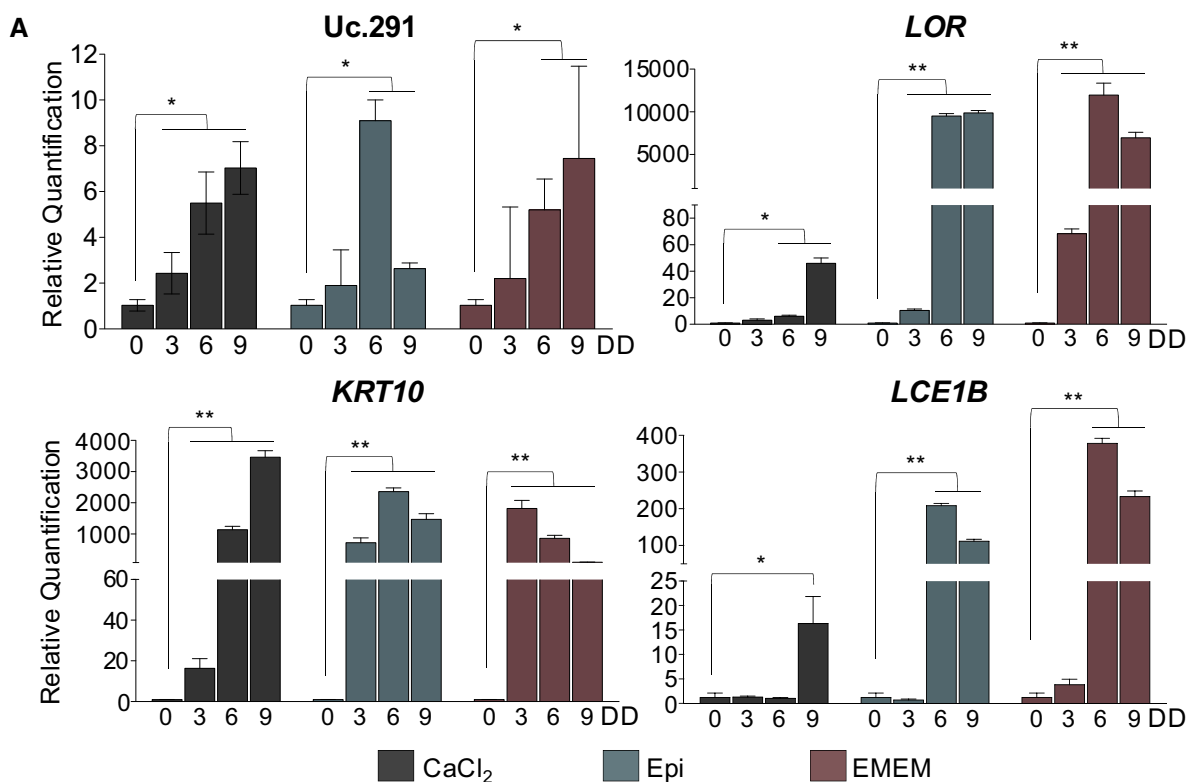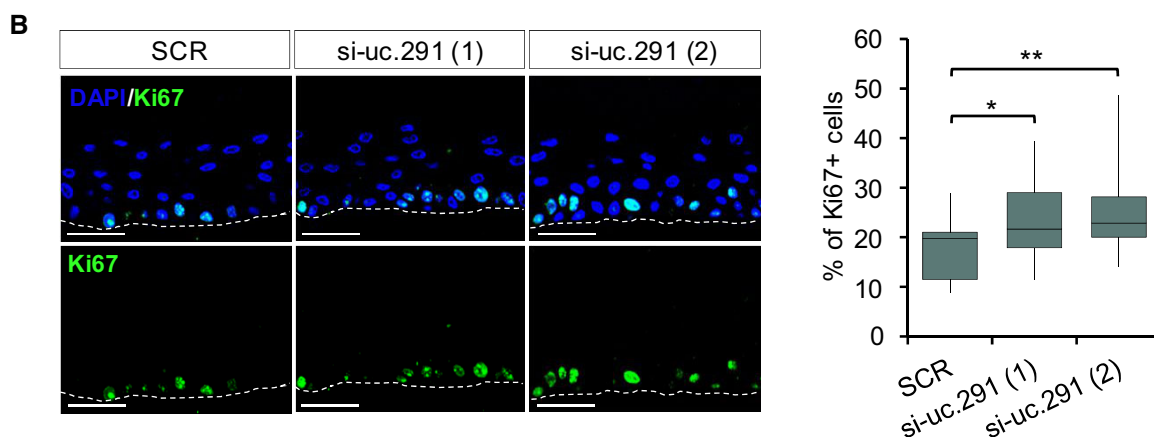

**Figure EV3. uc.291 is up-regulated during keratinocyte differentiation, regardless of the differentiation methodology.**

A RT-qPCR showing *uc.291* expression in HEK cells grown in calcium-induced differentiation (CaCl<sub>2</sub>) or confluence-induced differentiation (in Epi and EMEM).

CaCl<sub>2</sub> = calcium chloride; Epi = EpiLife; EMEM = Eagle's minimum essential medium. *LOR*, *KRT10* and *LCE1B* were used as differentiation markers. DD = days of differentiation; the quantification is relative to the same expression in undifferentiated HEK cells (0 DD); data shown represent the mean ± standard deviation; *n* = 3 (technical); \**P* < 0.05, \*\**P* < 0.01, Student's *t*-test.

B Box plot showing quantification of Ki67-positive nuclei on total nuclei. In parallel with the increase of p63 expression (Fig 2), depletion of *uc.291* affects the proliferation rate of basal keratinocytes. Each central line represents the median; each box represents Q1 (quartile 1, below the median) and Q3 (quartile 3, above the median); the whiskers represent minimum (Q1 - 1.5\*IQR) and maximum (Q3 + 1.5\*IQR). IQR = interquartile range; 15, 14 and 15 images were analysed for SCR, si-*uc.291* (1) and si-*uc.291* (2), respectively; \**P* < 0.05; \*\**P* < 0.01, Student's *t*-test.

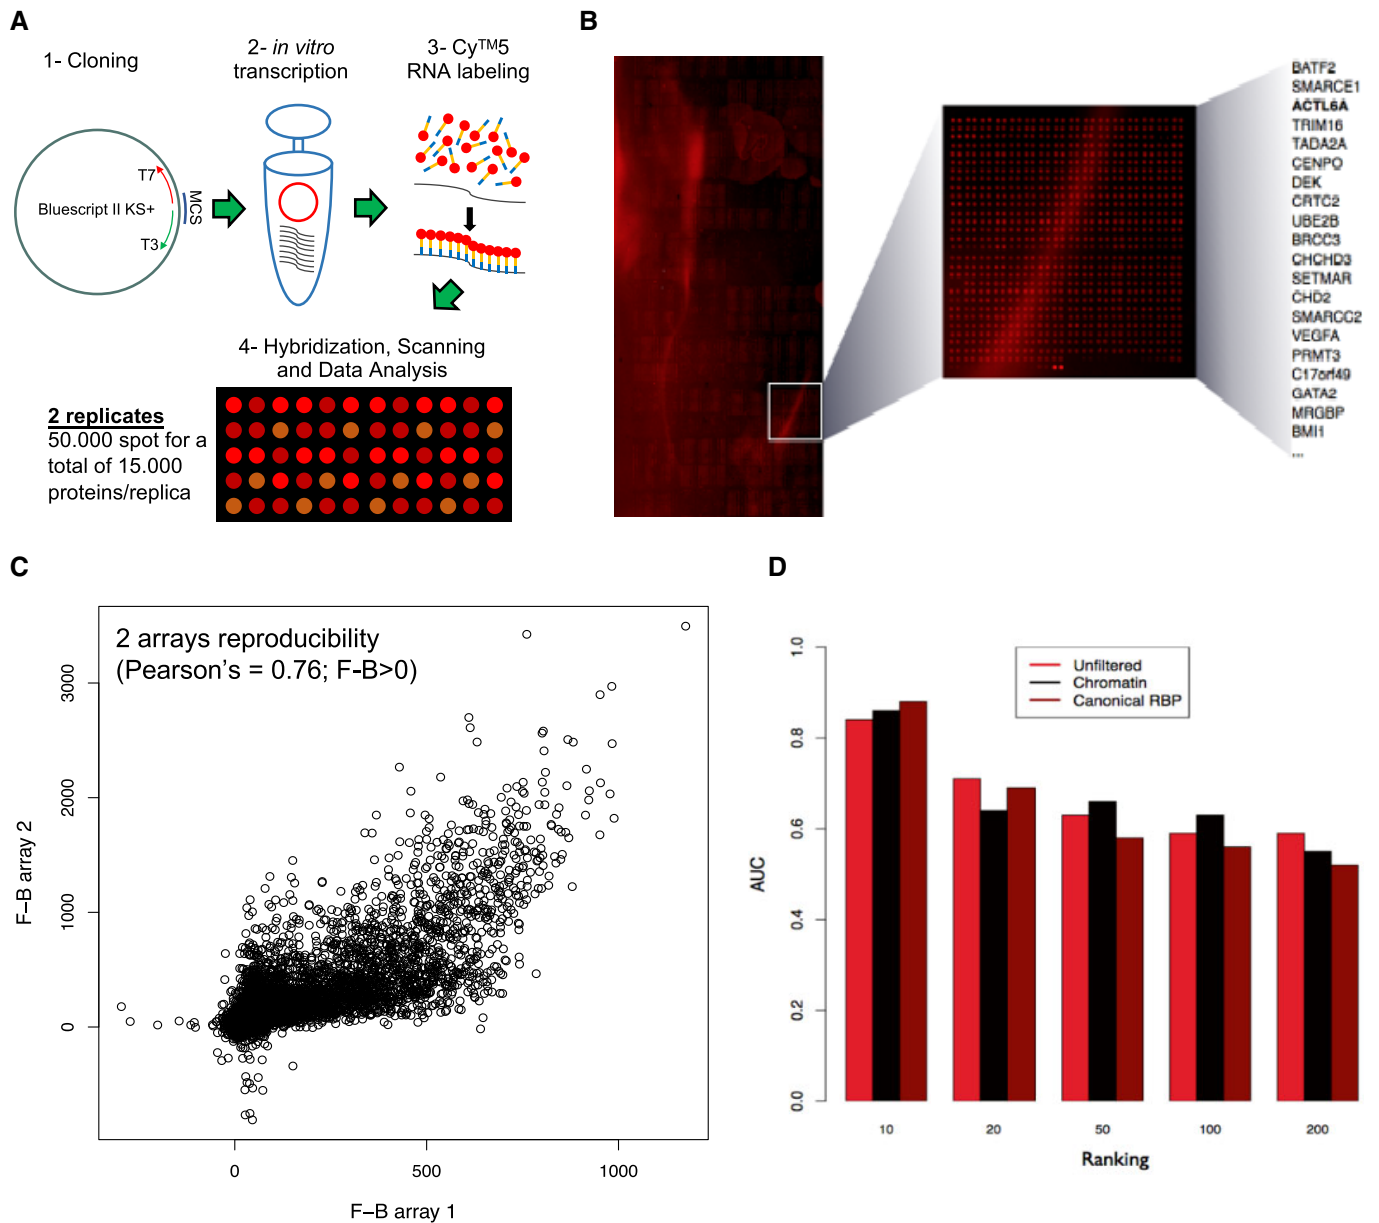

**Figure EV4. Uc.291 protein microarray.**

- A Schematic depicting high-throughput analysis performed to identify uc.291 protein interactome.
- B Protein array analysis showing the top 20 chromatin-related candidates; see also Appendix Table S2.
- C Reproducibility between the two human recombinant protein arrays spotted with 50,000 different proteins. (Pearson's correlation = 0.76; F-B > 0).
- D Area under ROC curve (AUC) to assess Global Score [34] ability to separate proteins interacting with uc.291 from those that are non-interacting. The F-B score was employed to select different groups of high-affinity (top ranked) and low-affinity (bottom ranked) interactions reported in the array: (1) RBP, (2) chromatin-related and (3) unfiltered (i.e. without selecting by category). In all cases, Global Score performances increase from poor signal (top/bottom 200) to strong signal (top/bottom 10) interactions, showing AUCs that raise from 0.60 to 0.80.

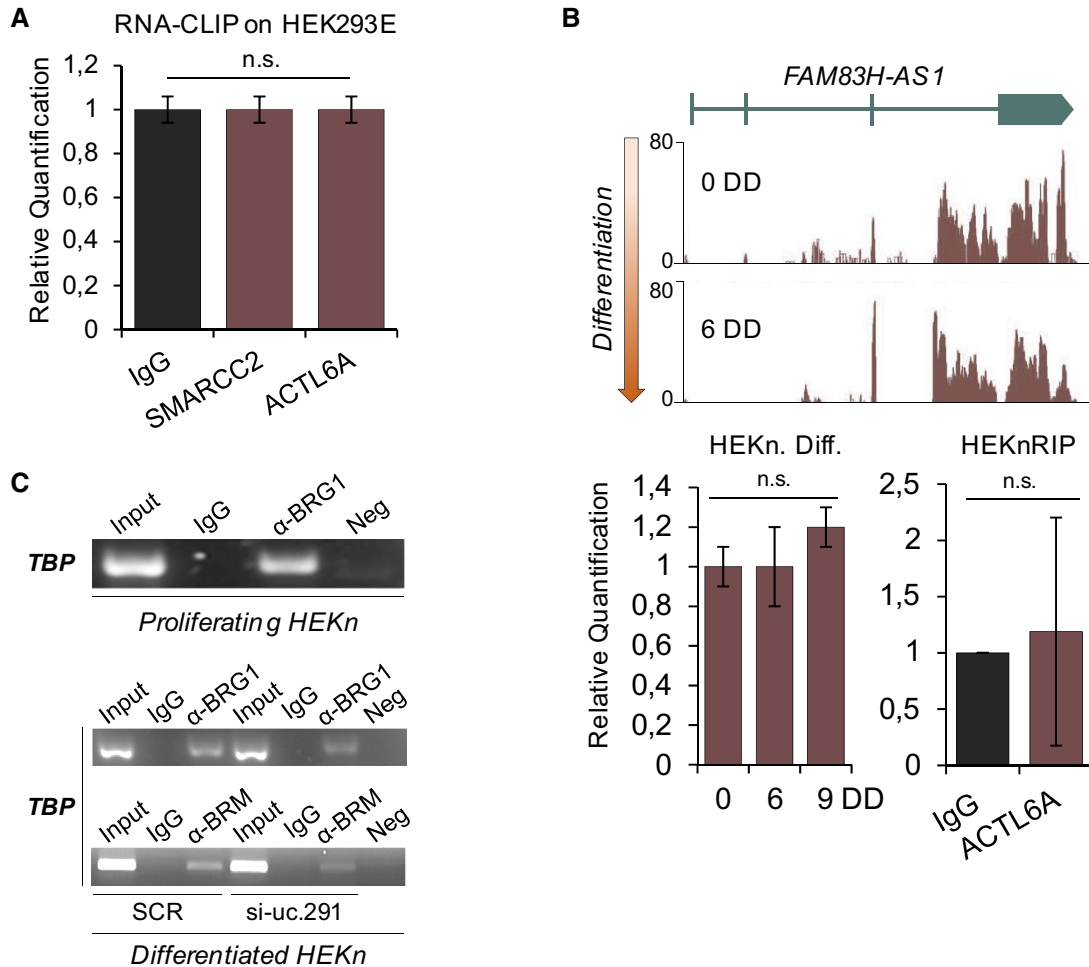

#### Figure EV5. Negative controls for RIP, CLIP and ChIP.

- A RT-qPCR amplifying the lncRNA FAM83H-AS1 used as negative control in the RNA-CLIP experiment (Fig 4C). Note that FAM83H-AS1 resulted expressed in HEK293E ( $C_t$  mean in the input = 26.3, data not shown) but was undetectable in all the immunoprecipitated samples (IgG, SMARCC2, ACTL6A). The same samples of Fig 4C were used ( $n = 3$  technical); n.s. = not significant, Student's  $t$ -test; HEK293 = human embryonic kidney 293.
- B FAM83H-AS1 was used as negative control for the RIP performed in HEKn (Fig 4D). On top, RNA sequencing in HEKn (from Ref. 8) showing FAM83H-AS1 expression is unchanged during keratinocyte differentiation. On bottom, RT-qPCR confirming FAM83H-AS1 is not modulated during the *in vitro* differentiation process (left histogram; same samples of Fig 1B ( $n = 4$  different human donors) were used) and it does not interact with ACTL6A (right histogram; same samples of Fig 4D ( $n = 3$  replicates on 1 human donor) were used); n.s. = not significant, Student's  $t$ -test; DD = days of differentiation.
- C On the top, end-point PCR of TATA-box-binding protein (TBP) promoter after BRG1 chromatin IP in proliferating HEKn. On the bottom, end-point PCR of TBP promoter after BRG1 (upper agarose gel) and BRM (lower agarose gel) ChIP in differentiated HEKn silenced for uc.291. The same samples of Fig 5 were used.
