# Supplementary figures and images for: Long non‐coding RNA uc.291 controls epithelial differentiation by interfering with the ACTL6A/BAF complex
Source: PubMed Central journal article supplement — EMBO Rep. 2020 Feb 4;21(3):e46734. doi: 10.15252/embr.201846734 (PMC7054673; doi:10.15252/embr.201846734), 2020-02-04

WB Fig 4C

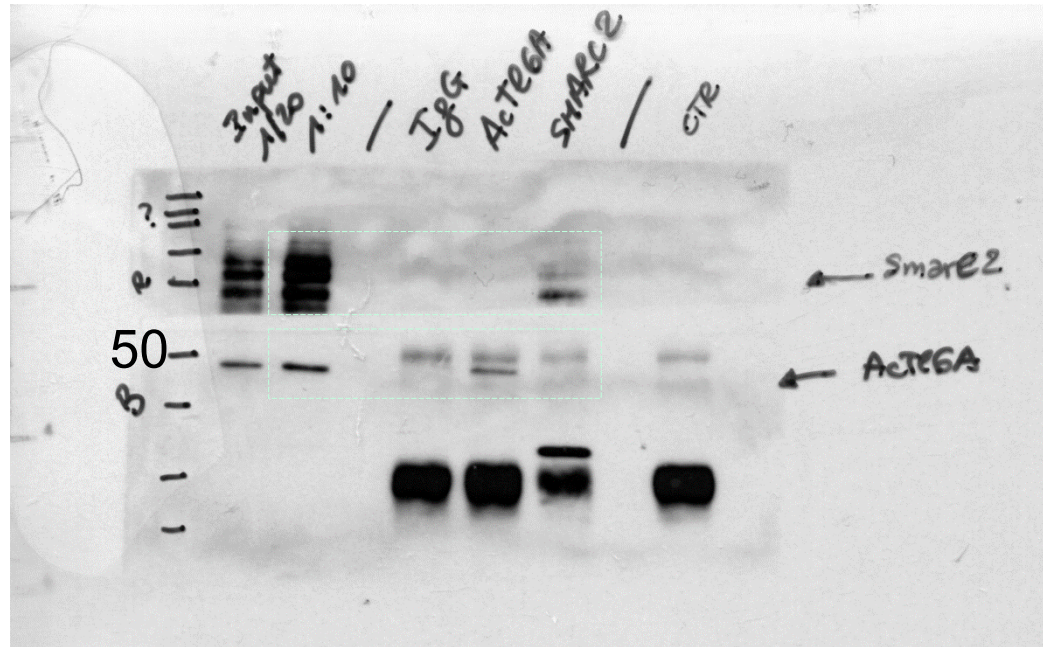

WB Fig 4D

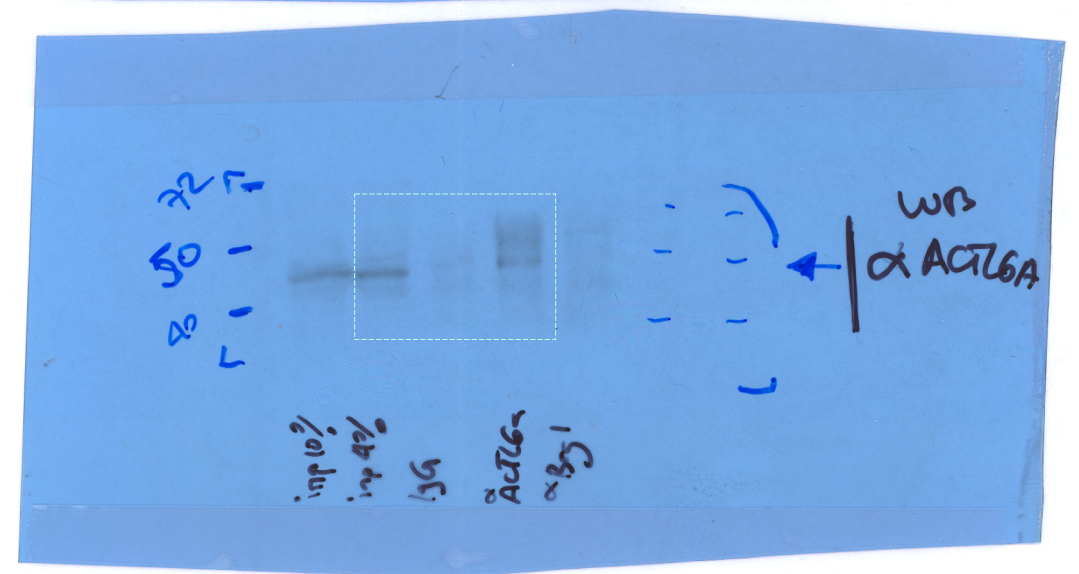

Dotted squares highlight the area selected for the figure assembly

Supplement: EMBR-21-e46734-s005.pdf [file EMBR-21-e46734-s005.pdf]

WB Fig 5E

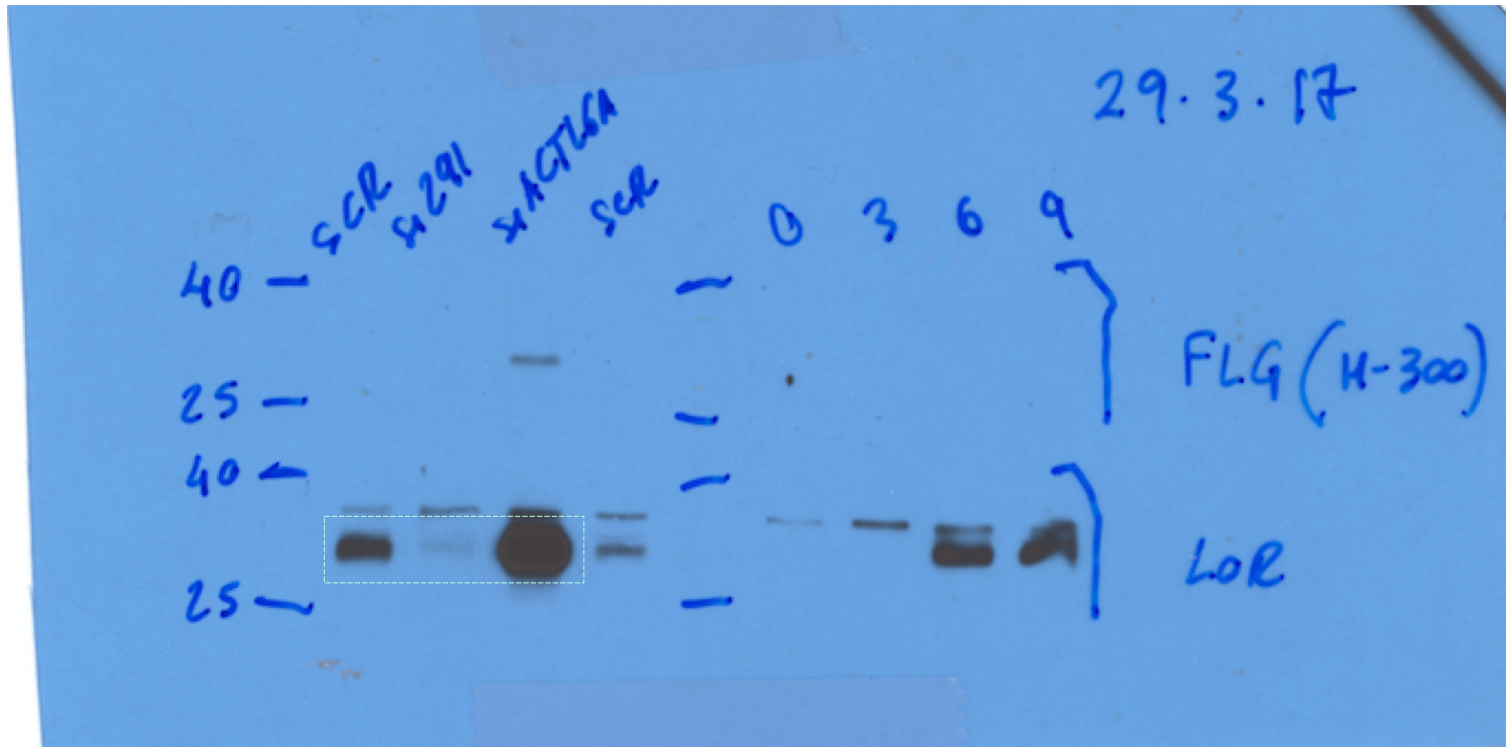

Dotted squares highlight the area selected for the figure assembly

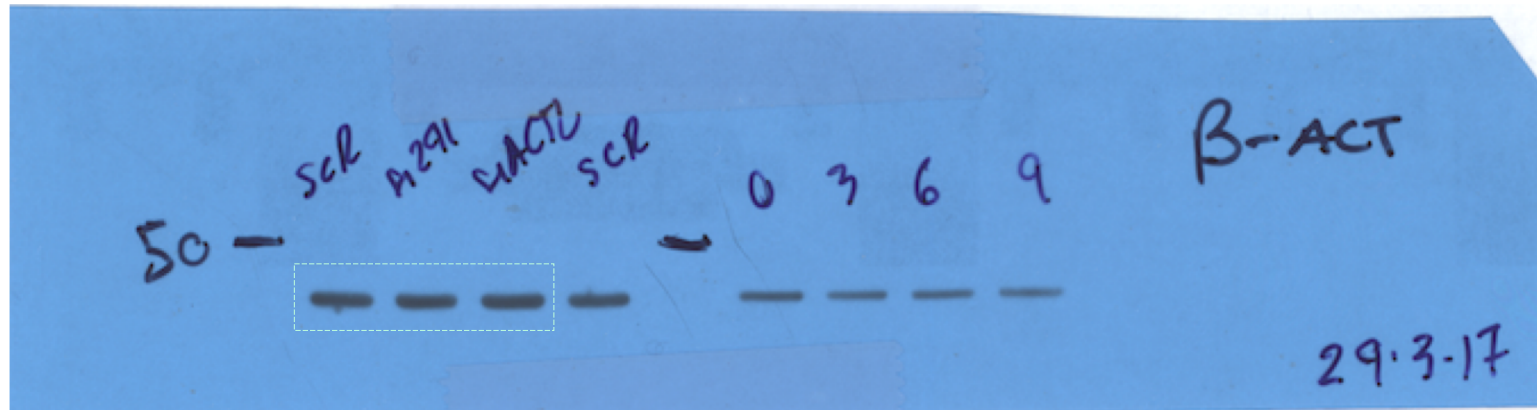

Supplement: EMBR-21-e46734-s006.pdf [file EMBR-21-e46734-s006.pdf]
